# Supplementary material for: Environmentally benign synthesis of saturated and unsaturated aliphatic polyesters via enzymatic polymerization of biobased monomers derived from renewable resources
Source: Royal Society of Chemistry journal article supplement (doi:10.1039/c5py00660k), 2015-01-01
Supplement: c5py00660k1.pdf [file c5py00660k1.pdf]

## Supporting Information

Environmentally benign synthesis of saturated and unsaturated aliphatic polyesters via enzymatic polymerization of biobased monomers derived from renewable resources

Yi Jiang <sup>1,2</sup>, Albert J. J. Woortman <sup>1</sup>, Gert O.R. Alberda van Ekenstein <sup>1</sup>, and Katja Loos <sup>1,2,\*</sup>

<sup>1</sup> Department of Polymer Chemistry, Zernike Institute for Advanced Materials, University of Groningen, Nijenborgh 4, 9747 AG Groningen, The Netherlands

<sup>2</sup> Dutch Polymer Institute (DPI), P.O. Box 902, 5600 AX Eindhoven, The Netherlands

\* Tel: +31-50 363 6867, E-mail: k.u.loos@rug.nl

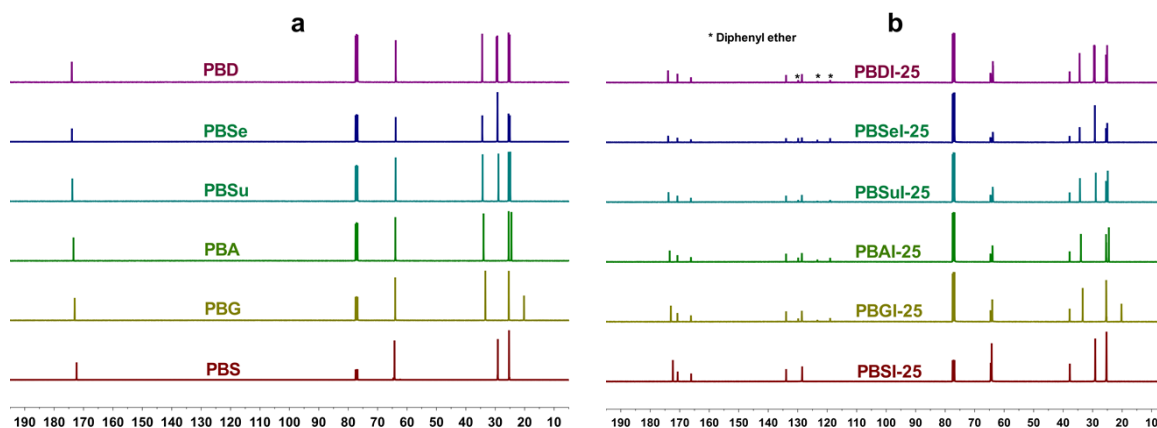

**Figure S1.** Representative <sup>13</sup>C-NMR spectra of the obtained aliphatic polyesters: (a) saturated aliphatic polyesters; and (b) unsaturated aliphatic polyesters containing around 25 % itaconate. PBS = poly(butylene succinate); PBG = poly(butylene glutarate); PBA = poly(butylene adipate); PBSu = poly(butylene suberate); PBSe = poly(butylene sebacate); PBD = poly(butylene

dodecanedioate) (PBD); PBSI = poly(butylene succinate-*co*-itaconate); PBGI = poly(butylene glutarate-*co*-itaconate); PBAI = poly(butylene adipate-*co*-itaconate); PBSuI = poly(butylene sebacate-*co*-itaconate); PBSel = poly(butylene sebacate-*co*-itaconate); PBDI = poly(butylene dodecanedioate-*co*-itaconate).

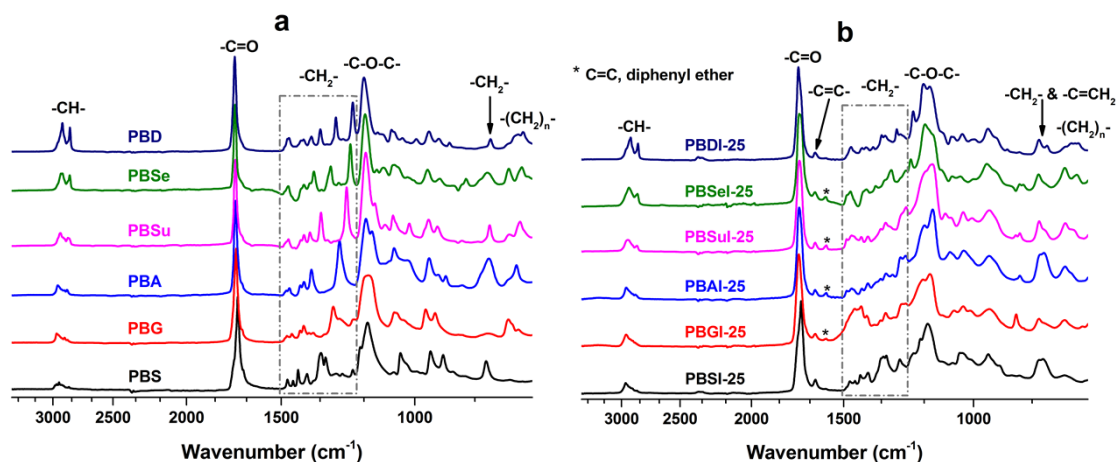

**Figure S2.** Representative ATR-FTIR spectra of the obtained aliphatic polyesters: (a) saturated aliphatic polyesters; and (b) unsaturated aliphatic polyesters containing around 25 % itaconate.

**Table S1.** Result summary: aliphatic polyesters from CALB-catalyzed two-stage polycondensation of diacid ethyl esters, dimethyl itaconate and 1,4-butanediol

| Polyester | Molar Composition (%) |                |                |                           |                |                | Molecular weight     |                      |                                         | Yield (%)       |
|-----------|-----------------------|----------------|----------------|---------------------------|----------------|----------------|----------------------|----------------------|-----------------------------------------|-----------------|
|           | Feed <sup>a</sup>     |                |                | Co-polyester <sup>b</sup> |                |                | SEC <sup>c</sup>     |                      |                                         |                 |
|           | F <sub>D</sub>        | F <sub>I</sub> | F <sub>B</sub> | X <sub>D</sub>            | X <sub>I</sub> | X <sub>B</sub> | $\bar{M}_n$ (kg/mol) | $\bar{M}_w$ (kg/mol) | $\mathcal{D}$ ( $\bar{M}_w/\bar{M}_n$ ) |                 |
| PBS       | 50                    | 0              | 50             | 50                        | 0              | 50             | 6.0                  | 11.5                 | 1.92                                    | 86 <sup>d</sup> |
| PBSI-15   | 35                    | 15             | 50             | 35                        | 16             | 49             | 13.3                 | 22.6                 | 1.70                                    | 90 <sup>d</sup> |
| PBSI-25   | 25                    | 25             | 50             | 27                        | 24             | 49             | 11.1                 | 16.6                 | 1.50                                    | 87 <sup>d</sup> |
| PBSI-15   | 20                    | 30             | 50             | 36                        | 16             | 48             | 1.9                  | 2.2                  | 1.16                                    | 21 <sup>e</sup> |
| PBSI-15   | 15                    | 35             | 50             | 41                        | 15             | 44             | 0.5                  | 0.5                  | 1.00                                    | 49 <sup>e</sup> |
| PBI       | 0                     | 50             | 50             | 0                         | 68             | 32             | 0.2                  | 0.2                  | 1.00                                    | 35 <sup>e</sup> |
| PBG       | 50                    | 0              | 50             | 49                        | 0              | 51             | 18.0                 | 39.1                 | 2.17                                    | 85 <sup>d</sup> |
| PBGI-15   | 35                    | 15             | 50             | 36                        | 14             | 50             | 20.7                 | 39.8                 | 1.92                                    | 84 <sup>d</sup> |
| PBGI-25   | 25                    | 25             | 50             | 26                        | 24             | 50             | 19.8                 | 37.2                 | 1.88                                    | 82 <sup>d</sup> |
| PBGI-30   | 20                    | 30             | 50             | 21                        | 29             | 50             | 13.7                 | 24.6                 | 1.80                                    | 76 <sup>d</sup> |
| PBGI-35   | 15                    | 35             | 50             | 16                        | 34             | 50             | 11.8                 | 23.5                 | 1.99                                    | 70 <sup>d</sup> |
| PBA       | 50                    | 0              | 50             | 50                        | 0              | 50             | 46.8                 | 94.0                 | 2.01                                    | 89 <sup>d</sup> |
| PBAI-15   | 35                    | 15             | 50             | 36                        | 15             | 50             | 24.6                 | 57.9                 | 2.35                                    | 84 <sup>d</sup> |
| PBAI-25   | 25                    | 25             | 50             | 26                        | 25             | 49             | 30.0                 | 55.3                 | 1.84                                    | 86 <sup>d</sup> |
| PBAI-30   | 20                    | 30             | 50             | 21                        | 30             | 49             | 20.1                 | 33.7                 | 1.68                                    | 78 <sup>d</sup> |
| PBAI-35   | 15                    | 35             | 50             | 17                        | 33             | 50             | 15.6                 | 30.3                 | 1.94                                    | 68 <sup>d</sup> |
| PBSu      | 50                    | 0              | 50             | 50                        | 0              | 50             | 18.0                 | 37.6                 | 2.09                                    | 87 <sup>d</sup> |
| PBSul-15  | 35                    | 15             | 50             | 36                        | 14             | 50             | 19.4                 | 38.7                 | 1.99                                    | 84 <sup>d</sup> |
| PBSul-25  | 25                    | 25             | 50             | 26                        | 24             | 50             | 20.2                 | 34.3                 | 1.70                                    | 87 <sup>d</sup> |
| PBSul-30  | 20                    | 30             | 50             | 22                        | 28             | 50             | 23.2                 | 46.9                 | 2.02                                    | 77 <sup>d</sup> |
| PBSul-35  | 15                    | 35             | 50             | 16                        | 34             | 50             | 15.8                 | 25.4                 | 1.61                                    | 70 <sup>d</sup> |
| PBSe      | 50                    | 0              | 50             | 50                        | 0              | 50             | 21.5                 | 39.5                 | 1.84                                    | 94 <sup>d</sup> |
| PBSel-15  | 35                    | 15             | 50             | 34                        | 18             | 48             | 21.1                 | 38.0                 | 1.80                                    | 84 <sup>d</sup> |
| PBSel-25  | 25                    | 25             | 50             | 26                        | 24             | 50             | 22.5                 | 41.6                 | 1.85                                    | 81 <sup>d</sup> |
| PBSel-30  | 20                    | 30             | 50             | 20                        | 31             | 49             | 18.7                 | 30.1                 | 1.61                                    | 79 <sup>d</sup> |
| PBSel-35  | 15                    | 35             | 50             | 17                        | 34             | 49             | 11.3                 | 29.1                 | 2.58                                    | 66 <sup>d</sup> |
| PBD       | 50                    | 0              | 50             | 49                        | 0              | 51             | 12.4                 | 26.3                 | 2.12                                    | 88 <sup>d</sup> |
| PBDI-15   | 35                    | 15             | 50             | 34                        | 18             | 48             | 17.3                 | 39.2                 | 2.27                                    | 87 <sup>d</sup> |
| PBDI-25   | 25                    | 25             | 50             | 26                        | 25             | 49             | 20.3                 | 34.6                 | 1.70                                    | 80 <sup>d</sup> |
| PBDI-30   | 20                    | 30             | 50             | 22                        | 28             | 50             | 21.9                 | 47.6                 | 2.17                                    | 82 <sup>d</sup> |
| PBDI-35   | 15                    | 35             | 50             | 17                        | 33             | 50             | 24.2                 | 49.5                 | 2.05                                    | 82 <sup>d</sup> |

<sup>a</sup> F<sub>D</sub>, F<sub>I</sub>, F<sub>B</sub>: molar percentage of diacid ethyl ester, dimethyl itaconate, and 1,4-butanediol fed into enzymatic polymerization; <sup>b</sup> X<sub>D</sub>, X<sub>I</sub>, X<sub>B</sub>: molar percentage of diacid ethyl ester units, itaconate units and butanediol units in the obtained aliphatic polyesters, calculated from <sup>1</sup>H-NMR; <sup>c</sup> The number average molecular weight ( $\bar{M}_n$ ), weight average molecular weight ( $\bar{M}_w$ ), and dispersity ( $\mathcal{D}$ ,  $\bar{M}_w/\bar{M}_n$ ) were determined by SEC in chloroform; <sup>d</sup> Isolated yield. The final products were precipitated in cold methanol (-20 °C); <sup>e</sup> Isolated yield. The final products were precipitated in hexane (r.t.).

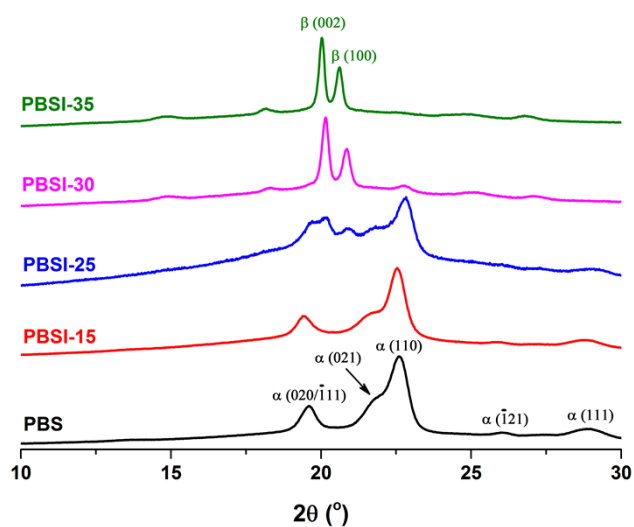

**Figure S3.** WAXD spectra of poly(butylene succinate) (PBS) and poly(butylene succinate-co-itaconate) (PBSI). The number 15/25/30/35 indicates the approximate molar percentage of itaconate in the co-polyesters.

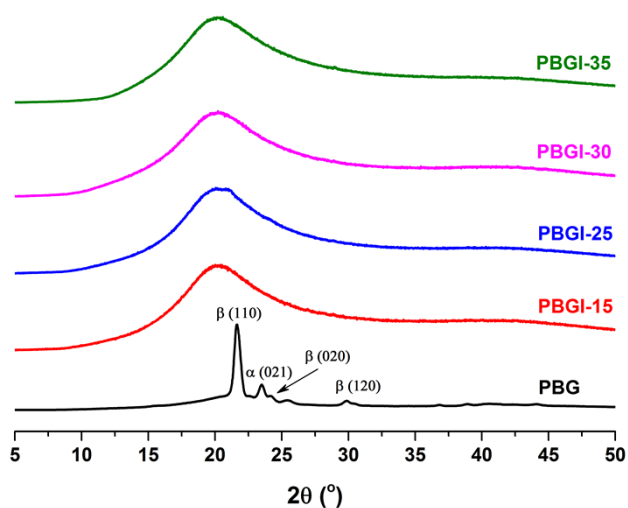

**Figure S4.** WAXD spectra of poly(butylene glutarate) (PBG) and poly(butylene glutarate-co-itaconate) (PBGI). The number 15/25/30/35 indicates the approximate molar percentage of itaconate in the co-polyesters.

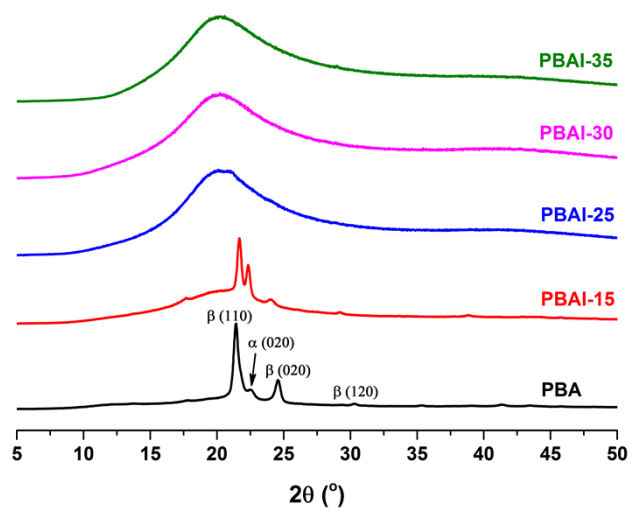

**Figure S5.** WAXD spectra of poly(butylene adipate) (PBA) and poly(butylene adipate-co-itaconate) (PBAI). The number 15/25/30/35 indicates the approximate molar percentage of itaconate in the co-polyesters.

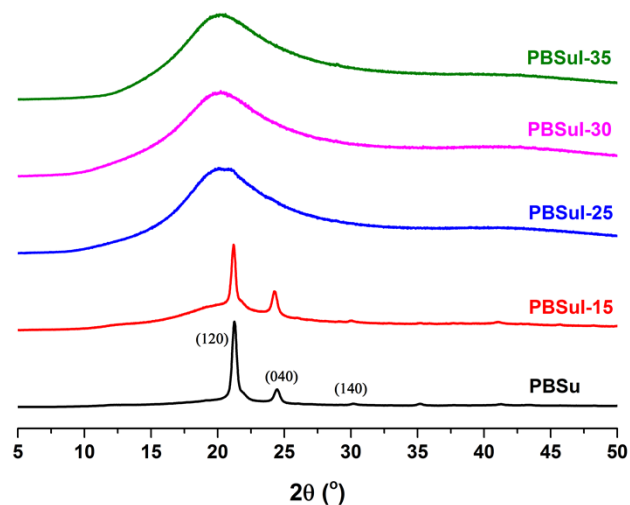

**Figure S6.** WAXD spectra of poly(butylene suberate) (PBSu) and poly(butylene suberate-co-itaconate) (PBSul). The number 15/25/30/35 indicates the approximate molar percentage of itaconate in the co-polyesters.

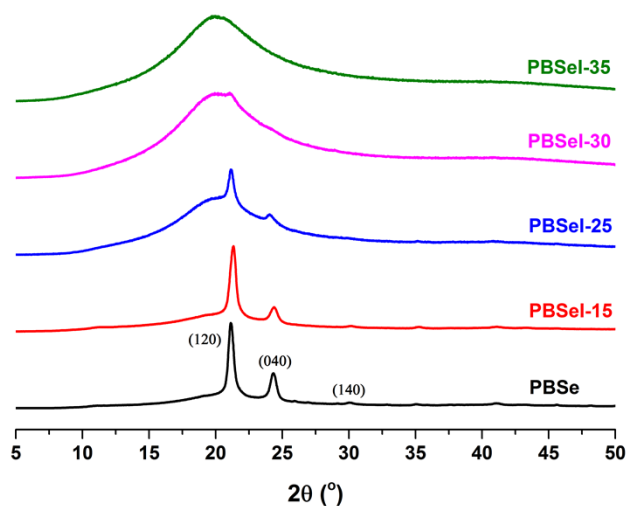

**Figure S7.** WAXD spectra of poly(butylene sebacate) (PBSe) and poly(butylene sebacate-co-itaconate) (PBSeI). The number 15/25/30/35 indicates the approximate molar percentage of itaconate in the co-polyesters.

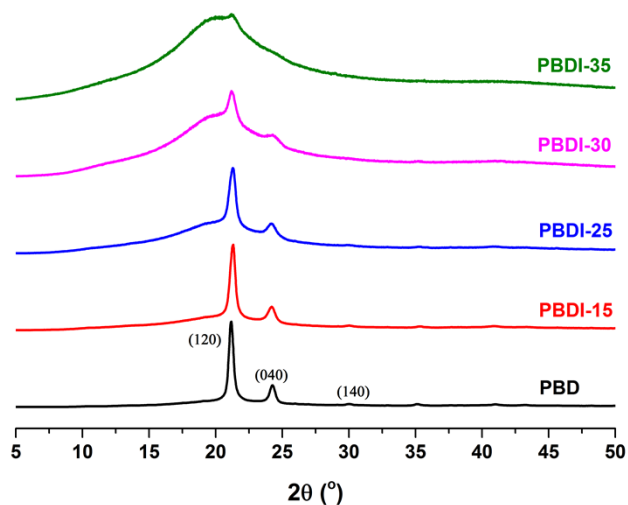

**Figure S8.** WAXD spectra of poly(butylene dodecanedioate) (PBD) and poly(butylene dodecanedioate-co-itaconate) (PBDI). The number 15/25/30/35 indicates the approximate molar percentage of itaconate in the co-polyesters.

**Table S2.** Thermal and crystalline properties of the obtained aliphatic polyesters.

| Polyester <sup>a</sup> | DSC <sup>b</sup> |               |                      |                    |            |                    |                |               |                      |                    | TMDSC <sup>c</sup> | TGA <sup>d</sup> |                  |                   | WAXD <sup>e</sup> |                  |
|------------------------|------------------|---------------|----------------------|--------------------|------------|--------------------|----------------|---------------|----------------------|--------------------|--------------------|------------------|------------------|-------------------|-------------------|------------------|
|                        | First Heating    |               |                      |                    | Cooling    |                    | Second Heating |               |                      |                    |                    | $T_g$ (°C)       | $T_{d-5\%}$ (°C) | $T_{d-10\%}$ (°C) |                   | $T_{d-max}$ (°C) |
|                        | $T_g$ (°C)       | $T_{cc}$ (°C) | $T_m$ (°C)           | $\Delta H_m$ (J/g) | $T_c$ (°C) | $\Delta H_m$ (J/g) | $T_g$ (°C)     | $T_{cc}$ (°C) | $T_m$ (°C)           | $\Delta H_m$ (J/g) |                    |                  |                  |                   |                   |                  |
| PBS                    | -28              | 80            | 98, 113 <sup>f</sup> | 91                 | 68         | 71                 | -30            | 88            | 99, 111 <sup>f</sup> | 83                 | -29                | 339              | 360              | 406               | 69                |                  |
| PBSI-15                | -37              | 39            | 82                   | 59                 | /          | /                  | -36            | 40            | 80                   | 16                 | -29                | 358              | 374              | 411               | 49                |                  |
| PBSI-25                | -38              | /             | 36, 60 <sup>f</sup>  | 30                 | /          | /                  | -36            | /             | /                    | 0                  | -37                | 327              | 365              | 406               | 31                |                  |
| PBSI-30                | -39              | /             | 42                   | 35                 | /          | /                  | -36            | /             | /                    | 0                  | -37                | 274              | 342              | 398               | 57                |                  |
| PBSI-35                | -43              | /             | 39                   | 38                 | /          | /                  | -38            | /             | /                    | 0                  | -38                | 279              | 344              | 399               | 63                |                  |
| PBG                    | -58              | /             | 53                   | 58                 | /          | /                  | -59            | -23           | 26, 38 <sup>f</sup>  | 38                 | -58                | 381              | 390              | 422               | 47                |                  |
| PBGI-15                | -54              | /             | /                    | /                  | /          | /                  | -52            | /             | /                    | 0                  | -51                | 352              | 382              | 419               | 0                 |                  |
| PBGI-25                | -49              | /             | /                    | /                  | /          | /                  | -45            | /             | /                    | 0                  | -44                | 365              | 381              | 418               | 0                 |                  |
| PBGI-30                | -47              | /             | /                    | /                  | /          | /                  | -43            | /             | /                    | 0                  | -43                | 356              | 374              | 415               | 0                 |                  |
| PBGI-35                | -43              | /             | /                    | /                  | /          | /                  | -36            | /             | /                    | 0                  | -33                | 368              | 385              | 425               | 0                 |                  |
| PBA                    | -55              | /             | 61, 66 <sup>f</sup>  | 78                 | 29         | 36                 | -59            | /             | 54                   | 33                 | -59                | 377              | 387              | 418               | 59                |                  |
| PBAI-15                | -53              | /             | 26                   | 31                 | /          | /                  | -53            | -10           | 18                   | 25                 | -54                | 366              | 385              | 423               | 16                |                  |
| PBAI-25                | -51              | /             | /                    | /                  | /          | /                  | -48            | /             | /                    | 0                  | -48                | 363              | 385              | 430               | 0                 |                  |
| PBAI-30                | -48              | /             | /                    | /                  | /          | /                  | -45            | /             | /                    | 0                  | -43                | 363              | 380              | 422               | 0                 |                  |
| PBAI-35                | -45              | /             | /                    | /                  | /          | /                  | -44            | /             | /                    | 0                  | -40                | 357              | 379              | 419               | 0                 |                  |
| PBSu                   | -56              | /             | 59                   | 102                | 36         | 74                 | -59            | /             | 57                   | 78                 | -62                | 384              | 393              | 420               | 63                |                  |
| PBSuI-15               | -56              | /             | 31, 40 <sup>f</sup>  | 42                 | /          | /                  | -54            | /             | 18                   | 4                  | -57                | 369              | 391              | 421               | 31                |                  |
| PBSuI-25               | -57              | /             | /                    | /                  | /          | /                  | -55            | /             | /                    | 0                  | -55                | 326              | 371              | 414               | 0                 |                  |
| PBSuI-30               | -53              | /             | /                    | /                  | /          | /                  | -51            | /             | /                    | 0                  | -51                | 361              | 381              | 422               | 0                 |                  |
| PBSuI-35               | -47              | /             | /                    | /                  | /          | /                  | -46            | /             | /                    | 0                  | -46                | 354              | 376              | 418               | 0                 |                  |
| PBSe                   | -55              | /             | 65                   | 101                | 48         | 73                 | -55            | /             | 67                   | 81                 | -54                | 382              | 391              | 420               | 62                |                  |
| PBSel-15               | -55              | /             | 48                   | 60                 | 20         | 46                 | -55            | /             | 39                   | 52                 | -52                | 384              | 394              | 426               | 46                |                  |
| PBSel-25               | -55              | -43           | 23                   | 32                 | /          | /                  | -59            | -36           | 7                    | 21                 | -51                | 352              | 383              | 429               | 14                |                  |
| PBSel-30               | -54              | -24           | 7                    | 22                 | /          | /                  | -55            | -18           | 5                    | 13                 | -54                | 351              | 380              | 428               | 5                 |                  |
| PBSel-35               | -49              | /             | /                    | /                  | /          | /                  | -52            | /             | /                    | 0                  | -48                | 364              | 382              | 424               | 0                 |                  |
| PBD                    | -44              | /             | 59, 73 <sup>f</sup>  | 121                | 56         | 88                 | -46            | /             | 56, 72 <sup>f</sup>  | 96                 | -46                | 384              | 394              | 421               | 75                |                  |
| PBDI-15                | -48              | /             | 54                   | 78                 | 31         | 50                 | -49            | /             | 51                   | 59                 | -47                | 384              | 396              | 429               | 60                |                  |
| PBDI-25                | -48              | /             | 45                   | 65                 | 16         | 33                 | -48            | /             | 32, 39 <sup>f</sup>  | 40                 | -45                | 378              | 390              | 430               | 37                |                  |
| PBDI-30                | -48              | /             | 23, 45 <sup>f</sup>  | 26                 | 5          | 29                 | -48            | /             | 27, 36 <sup>f</sup>  | 30                 | -46                | 365              | 382              | 426               | 14                |                  |
| PBDI-35                | -49              | 0             | 15                   | 18                 | -24        | 16                 | -50            | -1            | 12                   | 13                 | -45                | 366              | 385              | 428               | 5                 |                  |

<sup>a</sup> PBSI-25, PBSI-30 and PBSI-35 were prepared from the CALB-catalyzed azeotropic polymerization in the mixture of cyclohexane and toluene (see Y. Jiang, G. O. R. Alberda van Ekenstein, A. J. J. Woortman and K. Loos, *Macromol. Chem. Phys.*, 2014, **215**, 2185-2197). The other aliphatic polyesters were produced from the CALB-catalyzed two-stage polymerization in diphenyl ether; <sup>b</sup>  $T_g$  = glass transition temperature,  $T_{cc}$  = cold crystallization temperature upon heating,  $T_m$  = melting temperature,  $\Delta H_m$  = enthalpy of transition,  $T_c$  = crystallization temperature, / = not detected at the tested time scale; <sup>c</sup> TMDSC = Temperature Modulated Differential Scanning Calorimetry; <sup>d</sup>  $T_{d-5\%}$  = decomposition temperature at 5 % weight loss,  $T_{d-10\%}$  = decomposition temperature at 10 % weight loss,  $T_{d-max}$  = temperature at maximum rate of decomposition; <sup>e</sup> The degree of crystallinity ( $\chi_c$ ) was calculated from WAXD; <sup>f</sup> Multiple melting temperatures were observed.

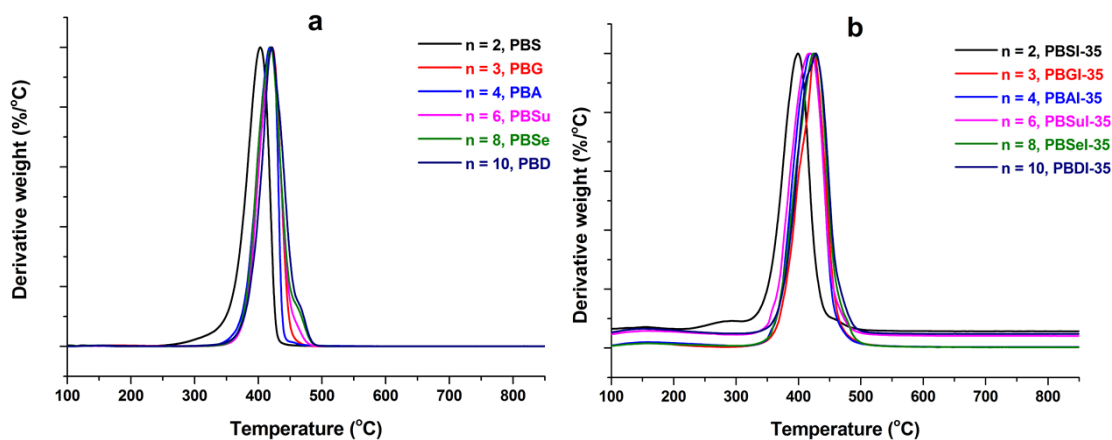

**Figure S9.** Representative TGA traces of the obtained aliphatic polyesters: (a) saturated aliphatic polyesters; and (b) unsaturated aliphatic polyesters containing around 35 % itaconate.

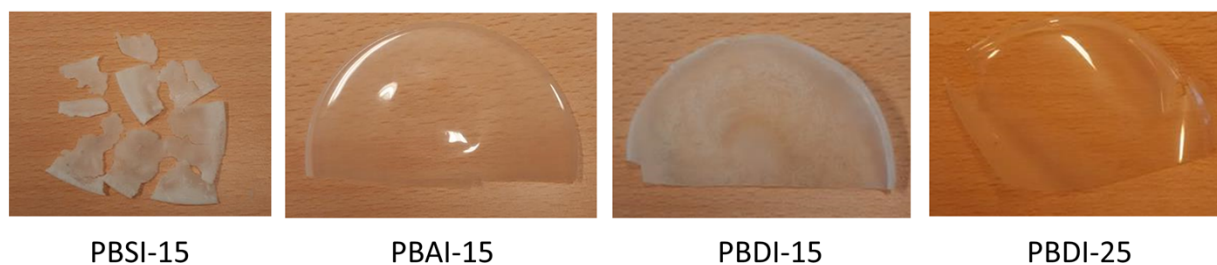

**Figure S10.** Representative UV-cured unsaturated aliphatic polyester films: poly(butylene succinate-*co*-itaconate) containing around 15 % itaconate (PBSI-15), poly(butylene adipate-*co*-itaconate) containing around 15 % itaconate (PBAI-15), poly(butylene dodecanedioate-*co*-itaconate) containing around 15 % (PBDI-15) and poly(butylene dodecanedioate-*co*-itaconate) containing around 25 % itaconate (PBDI-25).



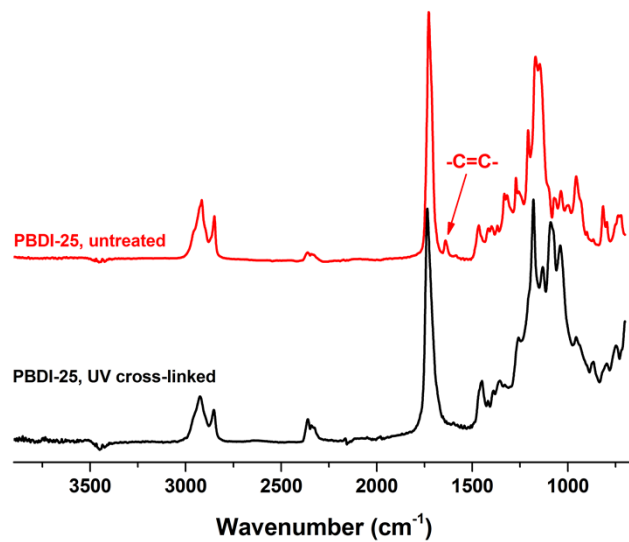

**Figure S11.** Representative ATR-FTIR spectra of poly(butylene dodecanedioate-*co*-itaconate) containing around 25 % itaconate (PBDI-25) before and after UV cross-linking.
